# Supplementary material for: A novel bioinformatics pipeline for the identification of immune inhibitory receptors as potential therapeutic targets
Source: eLife. 2024 Oct 8;13:RP92870. doi: 10.7554/eLife.92870 (PMC11460946; doi:10.7554/eLife.92870)
Supplement: Supplementary file 2. — Supplementary table corresponding to Figure 2—figure supplement 1 contains the numbers of multi-spanning receptors that have been categorised as ‘not expressed’, ‘negative feedback’, ‘threshold-negative feedback’, ‘threshold-disinhibition’, and ‘threshold’ in different immune cell subsets, i.e., neutrophils, monocytes, NK cells, B cells, and CD4+ and CD8+ T cells. [file elife-92870-supp2.xlsx]

## Sheet: Supplementary Table 2
Supplementary Table 2. Number of multi-spanning receptors in different functional categories for each immune cell subset
cell type	not expressed	negative feedback	threshold negative-feedback	threshold-disinhibition	threshold
Neutrophils	79	4	1	3	110
Monocytes	97	10	2	16	72
NK cells	107	7	1	3	79
B cells	102	13	0	7	75
CD4 T cells	106	13	2	5	71
CD8 T cells	106	11	2	6	72
